# Supplementary material for: Alkali-metal ion catalysis and inhibition in nucleophilic displacement reactions at carbon, phosphorus and sulfur centres. IX.For Part VIII see ref. 1. p-Nitrophenyl diphenyl phosphateElectronic supplementary information (ESI) available: kinetic data for the reaction of p-nitrophenyl diphenyl phosphate with various reagents in differing media. See http://www.rsc.org/suppdata/ob/b2/b208408b/
Source: Royal Society of Chemistry journal article supplement (doi:10.1039/b208408b), 2002-12-03
Supplement: tables.pdf [file tables.pdf]

## SUPPLEMENTARY MATERIALS

### SUPPLEMENTARY TABLES

Table S1. Kinetic data for the reaction of **3** with LiOEt in EtOH at 25.0°C. (See Figure 1).

Table S2. Kinetic data for the reaction of **3** with NaOEt in EtOH at 25.0°C. (See Figure 1).

Table S3. Kinetic data for the reaction of **3** with KOEt in EtOH at 25.0°C. (See Figure 1).

Table S4. Kinetic data for the reaction of **3** with CsOEt in EtOH at 25.0°C. (See Figure 1).

Table S5. Kinetic data for the reaction of **3** with KOEt in the presence of 18-Crown-6 in EtOH at 25.0°C. (See Figure 2).

Table S6(a). Kinetic data for the reaction of **3** with LiOEt in the presence of LiCl in EtOH at 25.0°C. Run ID BCC5. (See Figure 3).

Table S6(b). Kinetic data for the reaction of **3** with LiOEt in the presence of LiNO<sub>3</sub> in EtOH at 25.0°C. Run ID BCB5. (See Figure 3).

Table S6(c). Kinetic data for the reaction of **3** with KOEt in the presence of KO(O)CCH<sub>3</sub> in EtOH at 25.0°C. Run ID BCE5. (See Figure 3).

Table S6(d). Kinetic data for the reaction of **3** with KOEt in the presence of KI in EtOH at 25.0°C. Run ID BCF5. (See Figure 3).

Table S7. Kinetic data for the reaction of **3** with KOEt in the presence and absence of 18-Crown-6 and with added Bu<sub>4</sub>NCl in EtOH at 25.0°C. [KOEt]<sub>0</sub> = 0.0188 M.

Table S8. Data for the ion pairing treatment of the reaction of KOEt with **3** in EtOH at 25°C. (See Figure 4).

Table S9. Data for the ion pairing treatment of the reaction of KOEt with **3** in the presence of excess complexing agent in EtOH at 25°C. (See Figure 5).

Table S1. Kinetic data for the reaction of **3** with LiOEt in EtOH at 25.0°C.  
(See Figure 1).

| RUN ID | [LiOEt]<br>(M) | $k_{\text{obs}}$<br>(s <sup>-1</sup> ) |
|--------|----------------|----------------------------------------|
| BC4-3  | 0.00510        | 0.002373                               |
| BC4-4  | 0.0102         | 0.006767                               |
| BC4-5  | 0.0198         | 0.01633                                |
| BC4-6  | 0.0402         | 0.03649                                |
| BC4-7  | 0.0601         | 0.06061                                |
| BC4-10 | 0.0799         | 0.08307                                |
| BC4-8  | 0.0799         | 0.08538                                |

Table S2. Kinetic data for the reaction of **3** with NaOEt in EtOH at 25.0°C.  
(See Figure 1)

| RUN ID | [NaOEt]<br>(M) | $k_{\text{obs}}$<br>(s <sup>-1</sup> ) |
|--------|----------------|----------------------------------------|
| BA1-13 | 0.00106        | 2.106x10 <sup>-4</sup>                 |
| DPP5   | 0.00131        | 4.434x10 <sup>-4</sup>                 |
| BA1-21 | 0.00199        | 4.554x10 <sup>-4</sup>                 |
| DPP11  | 0.00218        | 5.669x10 <sup>-4</sup>                 |
| DPP10  | 0.00305        | 9.432x10 <sup>-4</sup>                 |
| DPP9   | 0.00524        | 2.307x10 <sup>-3</sup>                 |
| DPP8   | 0.00698        | 3.667x10 <sup>-3</sup>                 |
| BA1-25 | 0.00896        | 3.026x10 <sup>-3</sup>                 |
| DPP7   | 0.00918        | 5.240x10 <sup>-3</sup>                 |
| DPP6   | 0.01096        | 2.744x10 <sup>-3</sup>                 |
| DPP1   | 0.0131         | 7.264x10 <sup>-3</sup>                 |
| DPP3   | 0.0175         | 1.303x10 <sup>-2</sup>                 |
| DPP4   | 0.0175         | 1.152x10 <sup>-2</sup>                 |
| BA1-24 | 0.0200         | 9.877x10 <sup>-3</sup>                 |
| BA1-23 | 0.0298         | 1.693x10 <sup>-2</sup>                 |
| BA1-22 | 0.0396         | 2.441x10 <sup>-2</sup>                 |
| BA1-20 | 0.0498         | 2.919x10 <sup>-2</sup>                 |
| BA1-19 | 0.0596         | 3.709x10 <sup>-2</sup>                 |
| BA1-18 | 0.0695         | 4.748x10 <sup>-2</sup>                 |
| BA1-17 | 0.0793         | 6.350x10 <sup>-2</sup>                 |
| BA1-16 | 0.0895         | 7.654x10 <sup>-2</sup>                 |
| BA1-15 | 0.0980         | 8.569x10 <sup>-2</sup>                 |

Table S3. Kinetic data for the reaction of **3** with KOEt in EtOH at 25.0°C.  
(See Figure 1).

| RUN ID | [KOEt]<br>(M) | $k_{\text{obs}}$<br>(s <sup>-1</sup> ) | $k_{\text{obs}}$ average<br>(s <sup>-1</sup> ) | (std. dev.)<br>(s <sup>-1</sup> ) |
|--------|---------------|----------------------------------------|------------------------------------------------|-----------------------------------|
| BB2-8  | 0.00243       | 4.903x10 <sup>-4</sup>                 |                                                |                                   |
| BB2-2  | 0.00486       | 1.319x10 <sup>-3</sup>                 | 1.307x10 <sup>-3</sup>                         | (0.012x10 <sup>-3</sup> )         |
| BB2-7  | 0.00486       | 1.295x10 <sup>-3</sup>                 |                                                |                                   |
| BB1-1  | 0.0097        | 3.439x10 <sup>-3</sup>                 |                                                |                                   |
| BB2-1  | 0.0121        | 6.219x10 <sup>-3</sup>                 |                                                |                                   |
| BB2-11 | 0.0199        | 7.992x10 <sup>-3</sup>                 | 8.269x10 <sup>-3</sup>                         | (0.200x10 <sup>-3</sup> )         |
| BB2-9  | 0.0199        | 8.460x10 <sup>-3</sup>                 |                                                |                                   |
| BB2-10 | 0.0199        | 8.354x10 <sup>-3</sup>                 |                                                |                                   |
| BB2-12 | 0.0401        | 2.199x10 <sup>-2</sup>                 | 2.129x10 <sup>-2</sup>                         | (0.005x10 <sup>-2</sup> )         |
| BB2-13 | 0.0401        | 2.094x10 <sup>-2</sup>                 |                                                |                                   |
| BB2-14 | 0.0401        | 2.189x10 <sup>-2</sup>                 |                                                |                                   |
| BB4-8  | 0.0607        | 3.553x10 <sup>-2</sup>                 | 3.514x10 <sup>-2</sup>                         | (0.093x10 <sup>-2</sup> )         |
| BB4-1  | 0.0607        | 3.556x10 <sup>-2</sup>                 |                                                |                                   |
| BB4-2  | 0.0607        | 3.331x10 <sup>-2</sup>                 |                                                |                                   |
| BB2-16 | 0.0607        | 3.535x10 <sup>-2</sup>                 |                                                |                                   |
| BB4-7  | 0.0607        | 3.593x10 <sup>-2</sup>                 |                                                |                                   |
| BB2-17 | 0.0789        | 5.028x10 <sup>-2</sup>                 | 4.929x10 <sup>-2</sup>                         | (0.099x10 <sup>-2</sup> )         |
| BB2-18 | 0.0789        | 4.829x10 <sup>-2</sup>                 |                                                |                                   |
| BB4-6  | 0.0803        | 4.711x10 <sup>-2</sup>                 |                                                |                                   |
| BB4-4  | 0.100         | 6.457x10 <sup>-2</sup>                 | 6.497x10 <sup>-2</sup>                         | (0.306x10 <sup>-2</sup> )         |
| BB4-5  | 0.100         | 6.144x10 <sup>-2</sup>                 |                                                |                                   |
| BB2-6  | 0.100         | 6.890x10 <sup>-2</sup>                 |                                                |                                   |

Table S4. Kinetic data for the reaction of **3** with CsOEt in EtOH at 25.0°C.  
(See Figure 1).

| Run ID | [CsOEt]<br>(M) | $k_{\text{obs}}$<br>(s <sup>-1</sup> ) |
|--------|----------------|----------------------------------------|
| BD4-1  | 0.00497        | 0.001058                               |
| BD4-2  | 0.00921        | 0.002102                               |
| BD4-3  | 0.0200         | 0.005343                               |
| BD4-4  | 0.0400         | 0.01206                                |
| BD4-5  | 0.0600         | 0.01930                                |
| BD4-6  | 0.0829         | 0.02815                                |

Table S5. Kinetic data for the reaction of **3** with KOEt in the presence of 18-Crown-6 in EtOH at 25.0°C. (See Figure 2).

| RUN ID  | [KOEt]<br>(M) | [18C6]<br>(M) | [18C6]<br>[KOEt] | $k_{\text{obs}}$<br>(s <sup>-1</sup> ) | $k_{\text{obs}}/[\text{MOEt}]$<br>(s <sup>-1</sup> M <sup>-1</sup> ) |
|---------|---------------|---------------|------------------|----------------------------------------|----------------------------------------------------------------------|
| BB4-7   | 0.0607        | 0.0000        | 0.000            | 0.03593                                | 0.5918                                                               |
| BB4-8   | 0.0607        | 0.0000        | 0.000            | 0.03553                                | 0.5852                                                               |
| BBA4-1  | 0.0607        | 0.0121        | 0.200            | 0.03382                                | 0.5570                                                               |
| BBA4-2  | 0.0607        | 0.0243        | 0.400            | 0.02718                                | 0.4477                                                               |
| BBA4-12 | 0.0607        | 0.0304        | 0.500            | 0.02336                                | 0.3848                                                               |
| BBA4-3  | 0.0607        | 0.0364        | 0.600            | 0.02152                                | 0.3545                                                               |
| BBA4-4  | 0.0607        | 0.0486        | 0.80             | 0.01051                                | 0.1731                                                               |
| BBA4-8  | 0.0607        | 0.0607        | 1.00             | 0.007796                               | 0.1284                                                               |
| BBA4-11 | 0.0607        | 0.0607        | 1.00             | 0.009312                               | 0.1534                                                               |
| BBA4-6  | 0.0607        | 0.0607        | 1.00             | 0.008978                               | 0.1479                                                               |
| BBA4-9  | 0.0607        | 0.122         | 2.00             | 0.008177                               | 0.1347                                                               |
| BBA4-13 | 0.0607        | 0.182         | 3.00             | 0.008429                               | 0.1388                                                               |
| BBA4-10 | 0.0607        | 0.182         | 3.00             | 0.008324                               | 0.1371                                                               |
| BBA4-5  | 0.0152        | 0.078         | 5.14             | 0.001785                               | 0.1176                                                               |
| BBA4-7  | 0.0152        | 0.0455        | 3.00             | 0.002019                               | 0.1330                                                               |

Average  $k_{\text{obs}} / [\text{MOEt}]$  for ratios of [18-crown-6] / [KOEt]  $\geq 1.0 = 0.1336 \pm 0.0104$  s<sup>-1</sup>M<sup>-1</sup> corresponds to the constant rate observed after a 1:1 crown:metal ion ratio was achieved.

Table S6(a). Kinetic data for the reaction of **3** with LiOEt in the presence of LiCl in EtOH at 25.0°C. Run ID BCC5. (See Figure 3).

| Ratio<br>LiCl/LiOEt | $k_{\text{obs}}$<br>(s <sup>-1</sup> ) |
|---------------------|----------------------------------------|
| 0.00                | 3.01x10 <sup>-3</sup>                  |
| 1.47                | 4.12x10 <sup>-3</sup>                  |
| 3.30                | 4.94x10 <sup>-3</sup>                  |
| 6.60                | 5.85x10 <sup>-3</sup>                  |
| 9.90                | 6.10x10 <sup>-3</sup>                  |
| 19.8                | 7.13x10 <sup>-3</sup>                  |
| 30.1                | 7.36x10 <sup>-3</sup>                  |
| 49.9                | 7.66x10 <sup>-3</sup>                  |

Table S6(b). Kinetic data for the reaction of **3** with LiOEt in the presence of LiNO<sub>3</sub> in EtOH at 25.0°C. Run ID BCB5. (See Figure 3).

| Ratio<br>LiNO <sub>3</sub> /LiOEt | $k_{\text{obs}}$<br>(s <sup>-1</sup> ) |
|-----------------------------------|----------------------------------------|
| 0.00                              | 2.99x10 <sup>-3</sup>                  |
| 9.50                              | 6.13x10 <sup>-3</sup>                  |
| 19.3                              | 6.93x10 <sup>-3</sup>                  |
| 28.1                              | 7.04x10 <sup>-3</sup>                  |
| 38.7                              | 6.65x10 <sup>-3</sup>                  |
| 63.7                              | 6.86x10 <sup>-3</sup>                  |

Table S6(c). Kinetic data for the reaction of **3** with KOEt in the presence of KO(O)CCH<sub>3</sub> in EtOH at 25.0°C. Run ID BCE5. (See Figure 3).

| Ratio<br>KOOCCH <sub>3</sub> /KOEt | k <sub>obs</sub><br>(s <sup>-1</sup> ) |
|------------------------------------|----------------------------------------|
| 0.00                               | 1.31x10 <sup>-3</sup>                  |
| 3.36                               | 2.01x10 <sup>-3</sup>                  |
| 3.36                               | 1.97x10 <sup>-3</sup>                  |
| 4.70                               | 2.05x10 <sup>-3</sup>                  |
| 6.71                               | 1.97x10 <sup>-3</sup>                  |
| 10.1                               | 2.52x10 <sup>-3</sup>                  |
| 20.1                               | 2.92x10 <sup>-3</sup>                  |
| 30.2                               | 3.23x10 <sup>-3</sup>                  |
| 50.4                               | 3.63x10 <sup>-3</sup>                  |

Table S6(d). Kinetic data for the reaction of **3** with KOEt in the presence of KI in EtOH at 25.0°C. Run ID BCF5. (See Figure 3).

| Ratio<br>KI/KOEt | k <sub>obs</sub><br>(s <sup>-1</sup> ) |
|------------------|----------------------------------------|
| 0.00             | 1.81x10 <sup>-4</sup>                  |
| 1.19             | 2.23x10 <sup>-4</sup>                  |
| 4.94             | 3.16x10 <sup>-4</sup>                  |
| 7.90             | 3.48x10 <sup>-4</sup>                  |
| 13.8             | 3.71x10 <sup>-4</sup>                  |
| 27.7             | 4.53x10 <sup>-4</sup>                  |
| 41.5             | 4.85x10 <sup>-4</sup>                  |



Table S7. Kinetic data for the reaction of **3** with KOEt in the presence and absence of 18-Crown-6 and with added Bu<sub>4</sub>NCl in EtOH at 25.0°C. [KOEt]<sub>0</sub> = 0.0188 M.

| Run ID  | [18-C-6]<br>(M)        | $\frac{[18-C-6]}{[KOEt]}$<br>(ratio) | [Bu <sub>4</sub> NCl]<br>(M) | $\frac{[Bu_4NCl]}{[KOEt]}$<br>(ratio) | k <sub>obs</sub><br>(s <sup>-1</sup> ) | $\frac{k_{obs} (avg)}{k_{obs} \text{ for EtO-}}$<br>(ratio) |
|---------|------------------------|--------------------------------------|------------------------------|---------------------------------------|----------------------------------------|-------------------------------------------------------------|
| BBN6-5  | 0                      | 0                                    | 0                            | 0                                     | 7.295x10 <sup>-3</sup>                 |                                                             |
| BBN6-5  | 0                      | 0                                    | 0                            | 0                                     | 7.264x10 <sup>-3</sup>                 | .....3.301                                                  |
| BBA6-6  | 2.282x10 <sup>-2</sup> | 1.21                                 | 0                            | 0                                     | 2.186x10 <sup>-3</sup>                 |                                                             |
| BBA6-7  | 2.536x10 <sup>-2</sup> | 1.35                                 | 0                            | 0                                     | 2.225x10 <sup>-3</sup>                 | .....1.000                                                  |
| BBAD6-1 | 2.282x10 <sup>-2</sup> | 1.21                                 | 8.935x10 <sup>-3</sup>       | 0.474                                 | 2.279x10 <sup>-3</sup>                 | .....1.033                                                  |
| BBAD6-2 | 2.282x10 <sup>-2</sup> | 1.21                                 | 2.223x10 <sup>-2</sup>       | 1.187                                 | 2.295x10 <sup>-3</sup>                 | .....1.041                                                  |

Table S8. Data for the ion pairing treatment of the reaction of KOEt with **3** in EtOH at 25°C. (See Figure 4).

| Run ID           | [KOEt]<br>(M) | $k_{\text{obs}}$<br>(s <sup>-1</sup> ) | [EtO <sup>-</sup> ]<br>(M) | $k_{\text{obs}}/[\text{EtO}^-]$<br>(M <sup>-1</sup> s <sup>-1</sup> ) |
|------------------|---------------|----------------------------------------|----------------------------|-----------------------------------------------------------------------|
| BB2-8            | 0.00243       | 4.90x10 <sup>-4</sup>                  | 2.051x10 <sup>-3</sup>     | 2.391x10 <sup>-1</sup>                                                |
| BB2-2,4,7        | 0.00486       | 1.19x10 <sup>-3</sup>                  | 3.655x10 <sup>-3</sup>     | 3.252x10 <sup>-1</sup>                                                |
| BB1-1            | 0.00972       | 3.44x10 <sup>-3</sup>                  | 6.226x10 <sup>-3</sup>     | 5.524x10 <sup>-1</sup>                                                |
| BB2-1            | 0.01214       | 6.22x10 <sup>-3</sup>                  | 7.317x10 <sup>-3</sup>     | 8.499x10 <sup>-1</sup>                                                |
| BB2-9,10,11      | 0.01992       | 8.27x10 <sup>-3</sup>                  | 1.032x10 <sup>-2</sup>     | 8.009x10 <sup>-1</sup>                                                |
| BB2-12,13,14     | 0.04007       | 2.16x10 <sup>-2</sup>                  | 1.626x10 <sup>-2</sup>     | 1.329                                                                 |
| BB4-1,2,7,8,2-16 | 0.06071       | 3.51x10 <sup>-2</sup>                  | 2.100x10 <sup>-2</sup>     | 1.673                                                                 |
| BB2-17,18        | 0.07892       | 4.93x10 <sup>-2</sup>                  | 2.457x10 <sup>-2</sup>     | 2.006                                                                 |
| BB4-6            | 0.08026       | 4.71x10 <sup>-2</sup>                  | 2.482x10 <sup>-2</sup>     | 1.898                                                                 |
| BB2-5,6 4-3,4,5  | 0.10017       | 6.63x10 <sup>-2</sup>                  | 2.827x10 <sup>-2</sup>     | 2.347                                                                 |

$$R^2 = 1.000, \text{ slope} = 76.67 \pm 3.14$$

$$k_{\text{EtO}^-} = 0.0940 \pm 0.0915 \text{ M}^{-1}\text{s}^{-1}$$

$$k_{\text{KOEt}} = 0.8519 \pm 0.0348 \text{ M}^{-1}\text{s}^{-1}$$

Table S9. Data for the ion pairing treatment of the reaction of KOEt with **3** in the presence of excess

| Run ID | [KOEt]<br>(M) | [18-crown-6]<br>(M) | $k_{\text{obs}}$<br>(s <sup>-1</sup> ) | [18C6]/[EtO <sup>-</sup> ]<br>(M <sup>-1</sup> s <sup>-1</sup> ) | $k_{\text{obs}}/[\text{EtO}^-]$<br>(M <sup>-1</sup> s <sup>-1</sup> ) |
|--------|---------------|---------------------|----------------------------------------|------------------------------------------------------------------|-----------------------------------------------------------------------|
| BBA6-5 | 0.00911       | 0.01268             | 0.000864                               | 1.392                                                            | 0.09483                                                               |
| BBA6-4 | 0.01821       | 0.02789             | 0.001790                               | 1.531                                                            | 0.09831                                                               |
| BBA6-3 | 0.03882       | 0.06948             | 0.003997                               | 1.790                                                            | 0.1030                                                                |
| BBA6-2 | 0.06071       | 0.09128             | 0.006599                               | 1.504                                                            | 0.1087                                                                |
| BBA5-1 | 0.07892       | 0.09990             | 0.008653                               | 1.266                                                            | 0.1096                                                                |

$$R^2 = 0.962; \text{ slope} = 0.2172 \pm 0.0248$$

$$k_{\text{EtO}^-} = 0.0939 \pm 0.0014 \text{ M}^{-1}\text{s}^{-1}$$
